# Supplementary material
Source: PubMed Central journal article supplement (PMC4475942)
Supplement: pnas.201423674SI.pdf [file pnas.201423674SI.pdf]

# Supporting Information

Crowder and Reganold 10.1073/pnas.1423674112

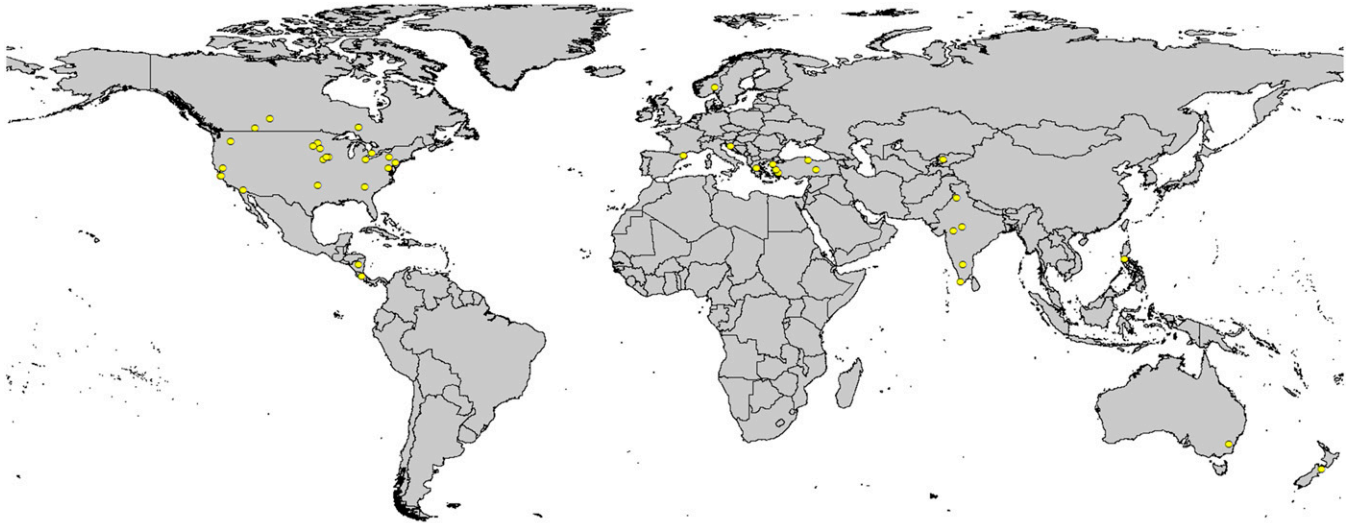

Fig. S1. Locations of the 44 studies included in our global meta-analysis.

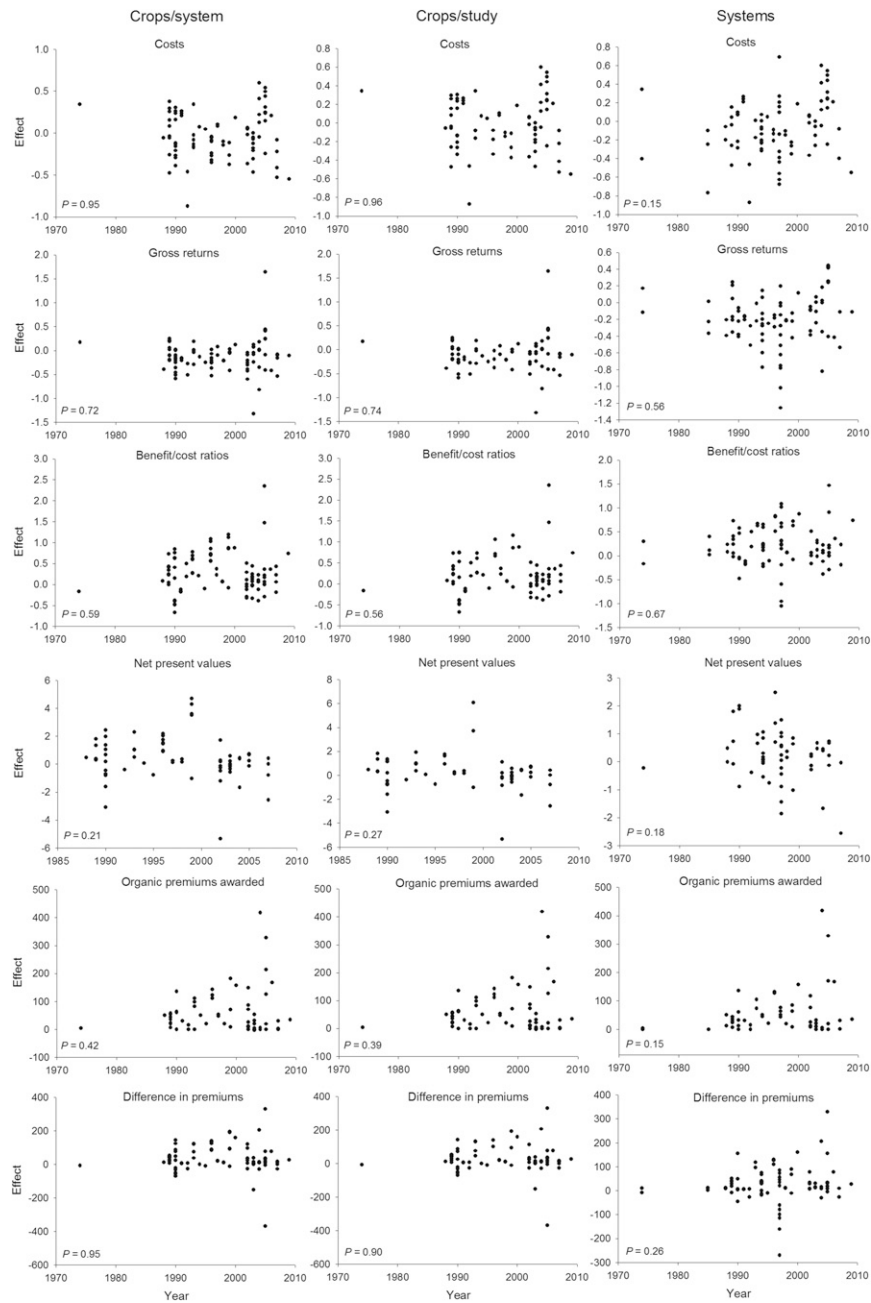

**Fig. S2.** Variation in effects based on the year studies were initiated. Shown are effect sizes for costs (log response-ratio), gross returns without premiums (log response-ratio), benefit/cost ratios with premiums (log response-ratio), net present values with premiums (Hedges  $d$ ), organic premiums awarded, and the differences between premiums awarded and breakeven premiums needed for organic net present values to match conventional net present values for organic crops and systems compared with their conventional counterparts. The x axis in each panel is the year studies in the meta-analysis were initiated. All regressions were not significant, indicating that effects did not vary significantly over time.



**Table S1. Financial performance of organic compared with conventional agriculture: Crops per system**

| Variable               | <i>N</i> | Mean   | SE    | Median | SE    | SR <sup>+</sup> | <i>P</i> |
|------------------------|----------|--------|-------|--------|-------|-----------------|----------|
| Total costs            | 91       | -0.027 | 0.029 | -0.050 | 0.034 | -226.5          | 0.36     |
| Variable costs         | 62       | 0.012  | 0.034 | -0.010 | 0.039 | 13.0            | 0.92     |
| Fixed costs            | 36       | 0.020  | 0.060 | 0.015  | 0.033 | 11.0            | 0.86     |
| Labor costs            | 38       | 0.20   | 0.073 | 0.13   | 0.039 | 186.0           | 0.0013   |
| Gross without premiums | 91       | -0.12  | 0.035 | -0.10  | 0.030 | -1,054.0        | <0.0001  |
| Gross with premiums    | 91       | 0.25   | 0.051 | 0.19   | 0.058 | 1198.0          | <0.0001  |
| B/C without premiums   | 91       | -0.085 | 0.036 | -0.070 | 0.043 | -585.0          | 0.016    |
| B/C with premiums      | 91       | 0.28   | 0.050 | 0.22   | 0.048 | 1170.5          | <0.0001  |

Shown are the mean and median effect sizes and their SEs using log response-ratios for costs, gross returns, and benefit/cost (B/C) ratios comparing organic crops (per system) with their conventional counterparts. Distributions of effect sizes were nonnormal, so we used nonparametric statistics [Wilcoxon signed-rank test (SR)] to analyze if effect sizes differed from 0. Values >0 indicate that costs, returns, or benefit/cost ratios were greater in organic crops, whereas values <0 indicate effect sizes were greater in conventional crops.

**Table S2. Financial performance of organic compared with conventional agriculture: Crops per study**

| Variable               | <i>N</i> | Mean   | SE    | Median | SE    | SR <sup>+</sup> | <i>P</i> |
|------------------------|----------|--------|-------|--------|-------|-----------------|----------|
| Total costs            | 77       | -0.011 | 0.032 | -0.040 | 0.052 | -37.0           | 0.85     |
| Variable costs         | 52       | 0.013  | 0.039 | -0.030 | 0.046 | 27.5            | 0.79     |
| Fixed costs            | 30       | 0.082  | 0.067 | 0.045  | 0.044 | 60.0            | 0.18     |
| Labor costs            | 35       | 0.17   | 0.076 | 0.11   | 0.044 | 140.0           | 0.0067   |
| Gross without premiums | 77       | -0.10  | 0.039 | -0.10  | 0.034 | -624.5          | 0.0005   |
| Gross with premiums    | 77       | 0.20   | 0.057 | 0.14   | 0.054 | 700.5           | 0.0002   |
| B/C without premiums   | 77       | -0.082 | 0.041 | -0.070 | 0.052 | -404.0          | 0.036    |
| B/C with premiums      | 77       | 0.22   | 0.053 | 0.17   | 0.053 | 701.0           | <0.0001  |

Shown are the mean and median effect sizes and their SEs using log response-ratios for costs, gross returns, and benefit/cost ratios comparing organic crops (per study) with their conventional counterparts. Distributions of effect sizes were nonnormal, so we used nonparametric statistics (Wilcoxon signed-rank test) to analyze if effect sizes differed from 0. Values >0 indicate that costs, returns, or benefit/cost ratios were greater in organic crops, whereas values <0 indicate effect sizes were greater in conventional crops.

**Table S3. Financial performance of organic compared with conventional agriculture: Systems**

| Variable               | <i>N</i> | Mean   | SE    | Median | SE    | SR <sup>+</sup> | <i>P</i> |
|------------------------|----------|--------|-------|--------|-------|-----------------|----------|
| Total costs            | 84       | -0.064 | 0.033 | -0.060 | 0.044 | -405.0          | 0.061    |
| Variable costs         | 49       | -0.095 | 0.049 | -0.10  | 0.060 | -178.5          | 0.067    |
| Fixed costs            | 36       | 0.051  | 0.060 | 0.025  | 0.025 | 71.0            | 0.21     |
| Labor costs            | 40       | 0.14   | 0.067 | 0.070  | 0.038 | 145.0           | 0.034    |
| Gross without premiums | 84       | -0.19  | 0.034 | -0.21  | 0.036 | -1,063.0        | <0.0001  |
| Gross with premiums    | 84       | 0.13   | 0.043 | 0.090  | 0.033 | 684.5           | 0.0018   |
| B/C without premiums   | 84       | -0.12  | 0.041 | -0.080 | 0.036 | -536.5          | 0.014    |
| B/C with premiums      | 84       | 0.21   | 0.045 | 0.18   | 0.046 | 945.0           | <0.0001  |

Shown are the mean and median effect sizes and their SEs using log response-ratios for costs, gross returns, and benefit/cost ratios comparing organic systems with their conventional counterparts. Distributions of effect sizes were nonnormal, so we used nonparametric statistics (Wilcoxon signed-rank test) to analyze if effect sizes differed from 0. Values >0 indicate that costs, returns, or benefit/cost ratios were greater in organic systems, whereas values <0 indicate effect sizes were greater in conventional systems.

**Table S4. Financial performance of organic compared with conventional agriculture using weighted effect sizes: Crops per system**

| Variable                          | <i>N</i> | Log RR (weighted) |                 |          | Hedges <i>d</i> |                 |          |
|-----------------------------------|----------|-------------------|-----------------|----------|-----------------|-----------------|----------|
|                                   |          | Median            | SR <sup>+</sup> | <i>P</i> | Median          | SR <sup>+</sup> | <i>P</i> |
| Total costs                       | 48       | -0.060            | -152.5          | 0.12     | -0.31           | -87.0           | 0.38     |
| Variable costs                    | 23       | -0.020            | -33.0           | 0.19     | -0.19           | -25.0           | 0.46     |
| Fixed costs                       | 11       | 0.060             | 20.5            | 0.031    | 0.47            | 17.0            | 0.14     |
| Labor costs                       | 18       | 0.0               | 22.5            | 0.018    | 0.74            | 33.0            | 0.061    |
| Net present value without premium | 70       |                   |                 |          | -0.38           | -673.0          | <0.0001  |
| Net present value with premium    | 70       |                   |                 |          | 0.35            | 513.5           | 0.0016   |
| Gross without premium             | 70       | -0.11             | -819.5          | <0.0001  | -0.52           | -849.5          | <0.0001  |
| Gross with premium                | 70       | 0.15              | 617.5           | 0.0002   | 0.47            | 485.5           | 0.0038   |
| B/C without premium               | 70       | -0.065            | -331.0          | 0.038    | -0.27           | -379.0          | 0.026    |
| B/C with premium                  | 70       | 0.16              | 712.5           | <0.0001  | 0.52            | 723.5           | <0.0001  |

Median effect sizes comparing organic crops (per system) with their conventional counterparts using log response-ratio (RR) with weighting or Hedges *d*. Values >0 indicate that effect sizes were greater in organic crops, whereas values <0 indicate that effect sizes were greater in conventional crops.

**Table S5. Financial performance of organic compared with conventional agriculture using weighted effect sizes: Crops per study**

| Variable                          | <i>N</i> | Log RR (weighted) |                 |          | Hedges <i>d</i> |                 |          |
|-----------------------------------|----------|-------------------|-----------------|----------|-----------------|-----------------|----------|
|                                   |          | Median            | SR <sup>+</sup> | <i>P</i> | Median          | SR <sup>+</sup> | <i>P</i> |
| Total costs                       | 44       | -0.075            | -164.5          | 0.054    | -0.47           | -123.0          | 0.15     |
| Variable costs                    | 22       | -0.025            | -37.5           | 0.23     | -0.29           | -31.0           | 0.33     |
| Fixed costs                       | 12       | 0.030             | 3.0             | 0.81     | 0.25            | -6.0            | 0.66     |
| Labor costs                       | 16       | 0.0               | 13.0            | 0.078    | 0.38            | 20.5            | 0.16     |
| Net present value without premium | 56       |                   |                 |          | -0.36           | -420.5          | 0.0002   |
| Net present value with premium    | 56       |                   |                 |          | 0.22            | 189.5           | 0.11     |
| Gross without premium             | 56       | -0.11             | -466.0          | <0.0001  | -0.45           | -487.5          | <0.0001  |
| Gross with premium                | 56       | 0.055             | 252.0           | 0.038    | 0.20            | 166.0           | 0.18     |
| B/C without premium               | 56       | -0.045            | -208.0          | 0.073    | -0.21           | -246.5          | 0.043    |
| B/C with premium                  | 56       | 0.095             | 358.5           | 0.0007   | 0.38            | 382.0           | 0.0013   |

Median effect sizes comparing organic crops (per study) with their conventional counterparts using log response-ratio with weighting or Hedges *d* value. Values >0 indicate that effect sizes were greater in organic crops, whereas values <0 indicate that effect sizes were greater in conventional crops.

**Table S6. Financial performance of organic compared with conventional agriculture using weighted effect sizes: Systems**

| Variable                          | N  | Log RR (weighted) |                 |         | Hedges <i>d</i> |                 |         |
|-----------------------------------|----|-------------------|-----------------|---------|-----------------|-----------------|---------|
|                                   |    | Median            | SR <sup>+</sup> | P       | Median          | SR <sup>+</sup> | P       |
| Total costs                       | 42 | -0.10             | -239.5          | 0.0011  | -0.57           | -212.5          | 0.0063  |
| Variable costs                    | 21 | -0.030            | -32.5           | 0.27    | -0.18           | -33.0           | 0.26    |
| Fixed costs                       | 11 | -0.020            | -2.5            | 0.83    | -0.15           | -12.0           | 0.32    |
| Labor costs                       | 12 | 0.0               | 9.0             | 0.094   | 0.38            | 17.5            | 0.084   |
| Net present value without premium | 59 |                   |                 |         | -0.37           | -545.5          | <0.0001 |
| Net present value with premium    | 59 |                   |                 |         | 0.23            | 314.0           | 0.017   |
| Gross without premium             | 59 | -0.17             | -619.0          | <0.0001 | -0.65           | -634.0          | <0.0001 |
| Gross with premium                | 59 | 0.050             | 213.5           | 0.11    | 0.18            | 192.0           | 0.15    |
| B/C without premium               | 59 | -0.070            | -288.0          | 0.024   | -0.17           | -301.0          | 0.022   |
| B/C with premium                  | 59 | 0.13              | 479.5           | <0.0001 | 0.42            | 509.0           | <0.0001 |

Median effect sizes comparing organic systems with their conventional counterparts using log response-ratio with weighting or Hedges *d*. Values >0 indicate that effect sizes were greater in organic systems, whereas values <0 indicate that effect sizes were greater in conventional systems.

**Table S7. Price premiums for organically grown crops and systems**

| Variable         | Premium awarded |     |        |     | Premium to match conventional |     |        |     | Difference |     |        |     | SR <sup>+</sup> | P       |
|------------------|-----------------|-----|--------|-----|-------------------------------|-----|--------|-----|------------|-----|--------|-----|-----------------|---------|
|                  | Mean            | SE  | Median | SE  | Mean                          | SE  | Median | SE  | Mean       | SE  | Median | SE  |                 |         |
| Crops per system | 59.2            | 7.7 | 31.7   | 9.1 | 18.9                          | 7.6 | 5.09   | 4.6 | 40.3       | 8.6 | 21.9   | 7.2 | 1,423.0         | <0.0001 |
| Crops per study  | 49.3            | 8.5 | 20.6   | 6.4 | 20.3                          | 8.9 | 4.50   | 4.1 | 29.0       | 9.3 | 15.3   | 4.0 | 876.5           | <0.0001 |
| Systems          | 48.5            | 8.8 | 29.5   | 6.0 | 19.1                          | 5.8 | 7.05   | 4.4 | 27.2       | 8.0 | 16.9   | 6.8 | 1,042.0         | <0.0001 |

Shown are the mean and median premiums awarded (and their SEs) for organic crops and farming systems; also shown are the mean and median premiums (and their SEs) that were needed for organic crops or systems to match the net present values of their conventional counterparts. The differences between the premium awarded and the premium needed to match conventional are also shown. The distribution of differences between awarded premiums and premiums to match conventional were nonnormal, so we used nonparametric statistics to evaluate whether these values were significantly different from 0 (Wilcoxon signed-rank test statistics shown). Values >0 indicate that the premiums awarded were significantly greater than the premiums needed to match conventional.

**Table S8. Sensitivity of organic-to-conventional effect sizes comparing total costs**

| Variable              | Crops/system |       | Crops/study |      | Systems |       |
|-----------------------|--------------|-------|-------------|------|---------|-------|
|                       | F            | P     | F           | P    | F       | P     |
| Crop type             | 0.64         | 0.74  | 0.44        | 0.89 | 1.31    | 0.26  |
| Continent             | 0.17         | 0.95  | 0.17        | 0.95 | 1.23    | 0.31  |
| Study duration        | 1.08         | 0.37  | 1.02        | 0.40 | 1.68    | 0.19  |
| Rotation length       | 0.83         | 0.48  | 1.43        | 0.25 | 2.93    | 0.041 |
| Annual/perennial      | 0.29         | 0.59  | 0.53        | 0.47 | 0.86    | 0.43  |
| Legume/not legume     | 0.42         | 0.52  | 0.0026      | 0.96 | 1.93    | 0.15  |
| Study type            | 0.41         | 0.67  | 0.42        | 0.66 | 0.73    | 0.49  |
| Time since conversion | 0.028        | 0.97  | 0.033       | 0.97 | 0.44    | 0.65  |
| Organic status        | 0.013        | 0.99  | 0.031       | 0.97 | 0.13    | 0.88  |
| Crop diversity        | 0.54         | 0.47  | 0.56        | 0.46 | 2.27    | 0.11  |
| Nitrogen input        | 3.82         | 0.037 | 0.80        | 0.46 | 0.19    | 0.83  |
| Country development   | 0.00         | 1.00  | 0.0002      | 0.99 | 0.25    | 0.62  |
| Latitude              | 0.033        | 0.86  | 0.035       | 0.85 | 0.13    | 0.72  |
| Study scale           | 0.63         | 0.43  | 0.65        | 0.42 | 1.24    | 0.27  |

Results of mixed-effects models testing the sensitivity of effect sizes (log response-ratios) for total costs to 14 categorical variables associated with studies in the meta-analysis. Significant effects indicate that total costs varied for different categories of the explanatory variable.

**Table S9. Sensitivity of organic-to-conventional effect sizes comparing gross returns without premiums**

| Variable              | Crops/system |          | Crops/study |          | Systems  |          |
|-----------------------|--------------|----------|-------------|----------|----------|----------|
|                       | <i>F</i>     | <i>P</i> | <i>F</i>    | <i>P</i> | <i>F</i> | <i>P</i> |
| Crop type             | 1.43         | 0.20     | 1.12        | 0.36     | 0.92     | 0.51     |
| Continent             | 0.43         | 0.79     | 0.43        | 0.79     | 0.49     | 0.79     |
| Study duration        | 2.46         | 0.089    | 2.57        | 0.076    | 1.40     | 0.26     |
| Rotation length       | 0.51         | 0.68     | 0.40        | 0.75     | 1.40     | 0.25     |
| Annual/perennial      | 0.26         | 0.61     | 0.037       | 0.85     | 0.026    | 0.97     |
| Legume/not legume     | 0.020        | 0.89     | 0.0070      | 0.93     | 0.92     | 0.40     |
| Study type            | 1.12         | 0.33     | 1.31        | 0.28     | 0.25     | 0.78     |
| Time since conversion | 0.083        | 0.92     | 0.15        | 0.86     | 0.66     | 0.52     |
| Organic status        | 0.66         | 0.52     | 0.74        | 0.48     | 0.12     | 0.88     |
| Crop diversity        | 0.19         | 0.66     | 0.31        | 0.58     | 12.9     | <0.0001  |
| Nitrogen input        | 0.37         | 0.69     | 0.52        | 0.60     | 0.11     | 0.90     |
| Country development   | 0.013        | 0.91     | 0.085       | 0.77     | 0.30     | 0.59     |
| Latitude              | 0.14         | 0.71     | 0.067       | 0.80     | 0.76     | 0.38     |
| Study scale           | 0.78         | 0.38     | 1.03        | 0.32     | 0.019    | 0.89     |

Results of mixed-effects models testing the sensitivity of effect sizes (log response-ratios) for gross returns without premiums to 14 categorical variables associated with studies in the meta-analysis. Significant effects indicate that gross returns without premiums varied for different categories of the explanatory variable.

**Table S10. Sensitivity of organic-to-conventional effect sizes comparing net present values with premiums**

| Response              | Crops/system |          | Crops/study |          | Systems  |          |
|-----------------------|--------------|----------|-------------|----------|----------|----------|
|                       | <i>F</i>     | <i>P</i> | <i>F</i>    | <i>P</i> | <i>F</i> | <i>P</i> |
| Crop type             | 3.38         | 0.0034   | 2.26        | 0.044    | 1.30     | 0.29     |
| Continent             | 1.48         | 0.24     | 1.13        | 0.35     | 0.33     | 0.85     |
| Study duration        | 1.82         | 0.18     | 1.27        | 0.31     | 2.45     | 0.098    |
| Rotation length       | 2.97         | 0.041    | 3.84        | 0.016    | 2.03     | 0.13     |
| Annual/perennial      | 7.06         | 0.0098   | 4.14        | 0.047    | 0.30     | 0.74     |
| Legume/not legume     | 3.59         | 0.064    | 2.52        | 0.12     | 3.57     | 0.066    |
| Study type            | 1.24         | 0.30     | 0.92        | 0.41     | 1.88     | 0.17     |
| Time since conversion | 0.30         | 0.74     | 0.17        | 0.85     | 1.00     | 0.39     |
| Organic status        | 0.13         | 0.88     | 0.24        | 0.79     | 0.66     | 0.53     |
| Crop diversity        | 2.78         | 0.11     | 1.89        | 0.18     | 3.11     | 0.059    |
| Nitrogen input        | 0.61         | 0.55     | 0.43        | 0.66     | 1.72     | 0.25     |
| Country development   | 1.30         | 0.26     | 0.91        | 0.35     | 3.14     | 0.087    |
| Latitude              | 1.36         | 0.25     | 1.05        | 0.31     | 2.55     | 0.12     |
| Study scale           | 0.88         | 0.35     | 0.63        | 0.44     | 0.98     | 0.33     |

Results of mixed-effects models testing the sensitivity of effect sizes (Hedges *d*) for net present values with premiums to 14 categorical variables associated with studies in the meta-analysis. Significant effects indicate that net present values with premiums varied for different categories of the explanatory variable.

**Table S11. Sensitivity of organic-to-conventional effect sizes comparing benefit/cost ratios with premiums**

| Variable              | Crops/system |          | Crops/study |          | Systems  |          |
|-----------------------|--------------|----------|-------------|----------|----------|----------|
|                       | <i>F</i>     | <i>P</i> | <i>F</i>    | <i>P</i> | <i>F</i> | <i>P</i> |
| Crop type             | 2.32         | 0.028    | 1.89        | 0.077    | 0.48     | 0.87     |
| Continent             | 0.36         | 0.84     | 0.30        | 0.87     | 0.26     | 0.93     |
| Study duration        | 1.07         | 0.38     | 0.97        | 0.42     | 0.41     | 0.75     |
| Rotation length       | 2.86         | 0.043    | 3.48        | 0.024    | 2.21     | 0.099    |
| Annual/perennial      | 1.10         | 0.30     | 0.63        | 0.43     | 0.075    | 0.93     |
| Legume/not legume     | 3.65         | 0.060    | 2.63        | 0.11     | 1.07     | 0.35     |
| Study type            | 0.67         | 0.52     | 0.57        | 0.57     | 0.53     | 0.59     |
| Time since conversion | 0.39         | 0.68     | 0.31        | 0.74     | 0.61     | 0.55     |
| Organic status        | 0.42         | 0.66     | 0.45        | 0.64     | 0.084    | 0.92     |
| Crop diversity        | 9.34         | 0.0037   | 7.89        | 0.0073   | 3.00     | 0.074    |
| Nitrogen input        | 1.40         | 0.26     | 1.20        | 0.32     | 1.48     | 0.27     |
| Country development   | 0.37         | 0.55     | 0.28        | 0.60     | 0.11     | 0.74     |
| Latitude              | 1.07         | 0.31     | 0.93        | 0.34     | 1.31     | 0.26     |
| Study scale           | 0.099        | 0.75     | 0.039       | 0.84     | 0.061    | 0.81     |

Results of mixed-effects models testing the sensitivity of effect sizes (log response-ratios) for benefit/cost ratios with premiums to 14 categorical variables associated with studies in the meta-analysis. Significant effects indicate that benefit/cost ratios with premiums varied for different categories of the explanatory variable.

**Table S12. Sensitivity of differences between organic premiums awarded and breakeven premiums for organic net present values to match conventional net present values**

| Variable              | Crops/system |          | Crops/study |          | Systems  |          |
|-----------------------|--------------|----------|-------------|----------|----------|----------|
|                       | <i>F</i>     | <i>P</i> | <i>F</i>    | <i>P</i> | <i>F</i> | <i>P</i> |
| Crop type             | 1.46         | 0.18     | 0.89        | 0.53     | 0.22     | 0.99     |
| Continent             | 0.41         | 0.80     | 0.29        | 0.88     | 0.23     | 0.95     |
| Study duration        | 2.53         | 0.087    | 2.58        | 0.12     | 0.60     | 0.62     |
| Rotation length       | 4.31         | 0.0082   | 2.64        | 0.057    | 2.28     | 0.088    |
| Annual/perennial      | 1.40         | 0.24     | 0.44        | 0.51     | 0.30     | 0.74     |
| Legume/not legume     | 9.51         | 0.0028   | 5.47        | 0.022    | 0.35     | 0.71     |
| Study type            | 0.68         | 0.51     | 0.43        | 0.65     | 0.63     | 0.53     |
| Time since conversion | 1.84         | 0.19     | 2.11        | 0.15     | 0.68     | 0.51     |
| Organic status        | 0.016        | 0.98     | 0.062       | 0.94     | 0.11     | 0.89     |
| Crop diversity        | 0.68         | 0.42     | 0.59        | 0.45     | 6.87     | 0.0020   |
| Nitrogen input        | 1.41         | 0.29     | 1.43        | 0.25     | 1.07     | 0.38     |
| Country development   | 0.49         | 0.49     | 0.45        | 0.51     | 0.0016   | 0.97     |
| Latitude              | 1.21         | 0.28     | 0.80        | 0.38     | 0.93     | 0.34     |
| Study scale           | 0.24         | 0.63     | 0.13        | 0.72     | 0.030    | 0.86     |

Results of mixed-effects models testing the sensitivity of differences in premiums awarded and premiums needed for organic net present values to break even with conventional net present values to 14 categorical variables associated with studies in the meta-analysis. Significant effects indicate that differences in premiums varied for different categories of the explanatory variable.



#### **Dataset S1. Raw data for the crops per system classification**

##### [Dataset S1](#)

The file contains data associated with each study that were used in the analysis of crops per system, including variables associated with each study, raw data on financial parameters, and effect size calculations.

#### **Dataset S2. Raw data for the crops per study classification**

##### [Dataset S2](#)

The file contains data associated with each study that were used in the analysis of crops per study, including variables associated with each study, raw data on financial parameters, and effect size calculations.

#### **Dataset S3. Raw data for the systems classification**

##### [Dataset S3](#)

The file contains data associated with each study that were used in the analysis of systems, including variables associated with each study, raw data on financial parameters, and effect size calculations.

#### **Dataset S4. List of studies that were not suitable for the meta-analysis**

##### [Dataset S4](#)

The file contains a list of studies that contained data on some aspects of conventional or financial performance but did not meet at least one of our inclusion criteria.

#### **Dataset S5. References for studies in the meta-analysis**

##### [Dataset S5](#)

The file contains a list of references associated with studies in the meta-analysis.
